# Supplementary material
Source: ML conference proceedings conference paper supplement (https://openaccess.thecvf.com/content/WACV2025/html/Pegeot_Temporal_Dynamics_in_WACV_2025_paper.html)
Supplement: Supplementary file 1 [file Pegeot_Temporal_Dynamics_in_WACV_2025_supplemental.pdf]

# Supplementary Material - Temporal Dynamics in Visual Data: Analyzing the Impact of Time on Classification Accuracy

Tom Pégeot\*

Eva Feillet\*,<sup>+</sup>

Adrian Popescu\*

Inna Kucher\*

Bertrand Delezoide<sup>†</sup>

(\*) Université Paris-Saclay, CEA, LIST  
F-91120 Palaiseau, France  
name.surname@cea.fr

(+) Université Paris-Saclay, CentraleSupélec, MICS  
F-91190 Gif-sur-Yvette, France  
name.surname@centralesupelec.fr

(†) Amanda  
F-75008, Paris, France

## A. Annotation interface

In Figure 1 we show the interface used by annotators to label the images of VCT-107. In this example, the annotator checks the annotation of images uploaded in 2008 and retrieved from Flickr using the keyword *carrot*. A class definition is provided to the annotator on top of the images. The images are grouped by cluster to facilitate the annotation. They are also sorted by cosine similarity to their cluster’s center for faster annotation (from left to right: highest similarity to lowest similarity). In this example, the images from the first and fourth rows are all validated by the annotator (green boxes). The annotator can simply double-click on the last image of a row (the image with the lowest cosine similarity) to validate all the images of the row. In Figure 2, we show an example of a cluster whose images are not all validated by the annotator. Here, the annotator selected only a subset of the images. Finally, the interface returns a JSON file with the validated images for each annotator.

## B. VCT-107 Content

A Box plots showing the number of images per data collection period and VCT-107 class is given in Figure 3.

In Table 1, we provide the list of classes corresponding to each metaclass. As explained in Section 3, each metaclass corresponds to a topic used to prompt ChatGPT-4o for obtaining related class names. In Tables 3, 4 and 5 we provide the total number of samples collected for each class and each period in VCT-107.

## C. Implementation details

All our experiments are implemented using PyTorch.

### C.1. Model checkpoints

Our experiments use the following pre-trained models:

- ResNet18 pre-trained on ILSVRC, available at

<https://pytorch.org/vision/main/models/generated/torchvision.models.resnet18.html>

- ViT-B/14 pre-trained on the LVD-142m dataset with DINOv2, available at [https://dl.fbaipublicfiles.com/dinov2/dinov2\\_vitb14/dinov2\\_vitb14\\_pretrain.pth](https://dl.fbaipublicfiles.com/dinov2/dinov2_vitb14/dinov2_vitb14_pretrain.pth),
- ViT-B/16 pre-trained on ImageNet-21k, available at [https://huggingface.co/timm/vit\\_base\\_patch16\\_224.augreg\\_in21k](https://huggingface.co/timm/vit_base_patch16_224.augreg_in21k).
- ViT-B/16 pre-trained on ILSVRC, available at [https://pytorch.org/vision/main/models/generated/torchvision.models.vit\\_b\\_16.html](https://pytorch.org/vision/main/models/generated/torchvision.models.vit_b_16.html).
- ViT-B-16 and ViT-L-14 based CLIP with openAI pre-training, available at [https://github.com/mlfoundations/open\\_clip](https://github.com/mlfoundations/open_clip)

### C.2. DIL experiments

In the following, we report the hyperparameter choices made in the DIL experiments from Subsection 4.4.

The nearest class mean classifier (NCM) relies on a frozen encoder. For each class, it computes a prototype by averaging the embedding vectors of the training samples belonging to this class. We implement NCM using the cosine distance.

Our implementation of FeCAM [2] is based on the original repository of the authors<sup>1</sup>. Results are obtained using the following hyperparameters for covariance shrinkage.

- FeCAM with a single covariance matrix:  $\alpha_1 = 1.0, \alpha_2 = 0.0$

<sup>1</sup><https://github.com/dipamgoswami/FeCAM>

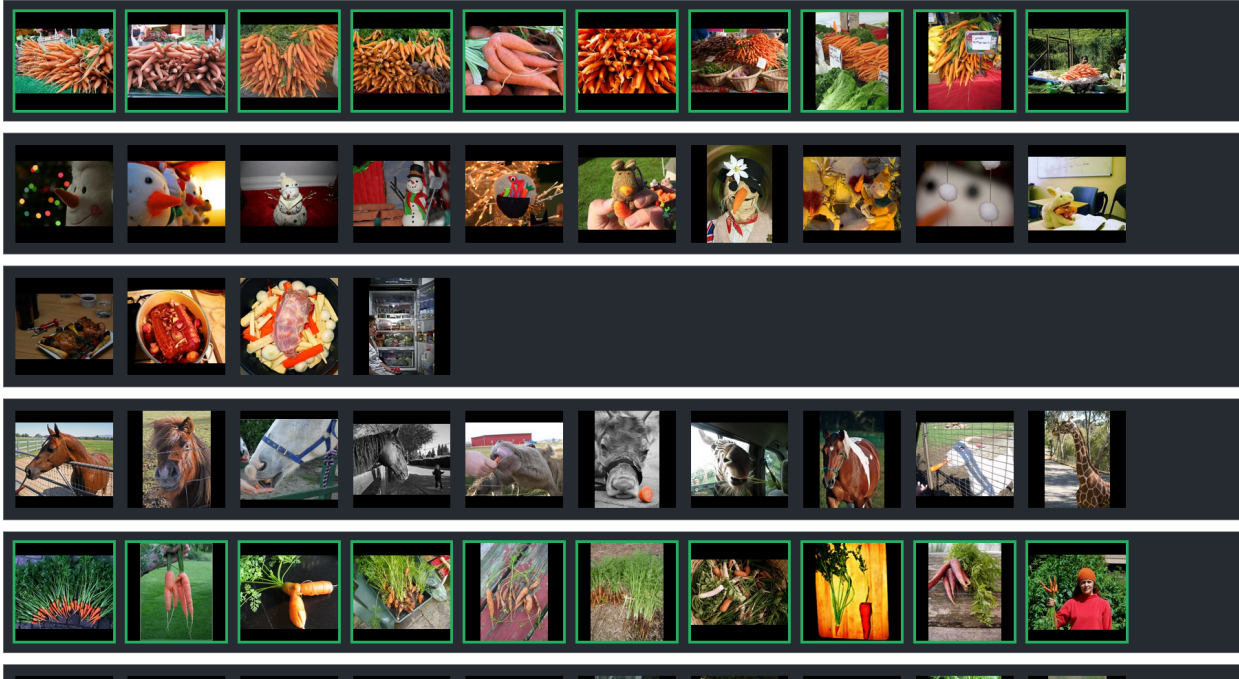

Figure 1. Annotation interface for the class “carrot”. The images are grouped by cluster. An annotator checks the assigned label manually.

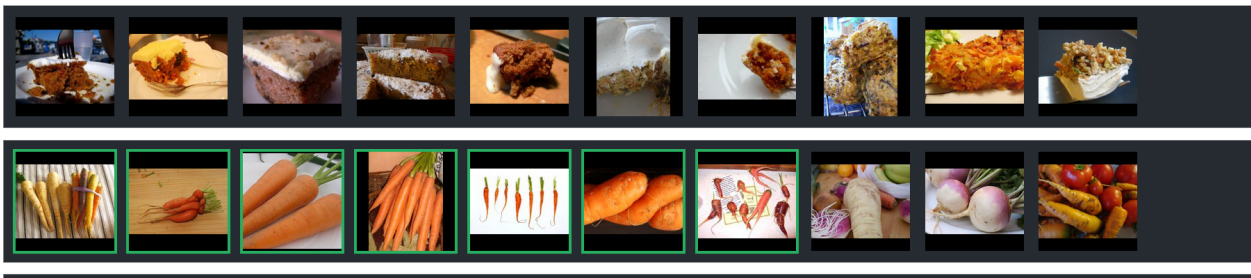

Figure 2. Annotation interface for the class “carrot”. Example of a cluster containing images that are only partially accepted as examples for the class “carrot” by the annotator.

- FeCAM with one covariance matrix per class:  $\alpha_1 = 10.0, \alpha_2 = 1.0$

Our implementation of RanPAC [3] is based on the original repository of the authors<sup>2</sup>. We keep the hyperparameters unchanged, notably  $M = 10,000$  the new embedding size for projecting the features.

The cumulative strategies “replay-20” and “accumulate” store either 20 or 200 training images per class and per period. At each step of the incremental process, we train a linear layer on top of the pre-trained encoder (linear probing). The linear layer is trained for 20 epochs using the

<sup>2</sup><https://github.com/RanPAC/RanPAC>

SGD optimizer with a momentum set to 0.9 and a weight decay set to  $4e^{-5}$ , and a cosine learning rate scheduler with a starting value of 0.1.

## D. Zero-shot classification with CLIP

In section 4.2 results are provided for CLIP ViT-B/16 and CLIP ViT-L/14 using linear probing. In the following, we provide the classification accuracy of the same ViT-B/16 network but in a zero-shot setting. These results provide insight into the relative difficulty of each period, which may vary slightly.

To make this classification we used the label of each class as input for the textual encoder. Textual class labels

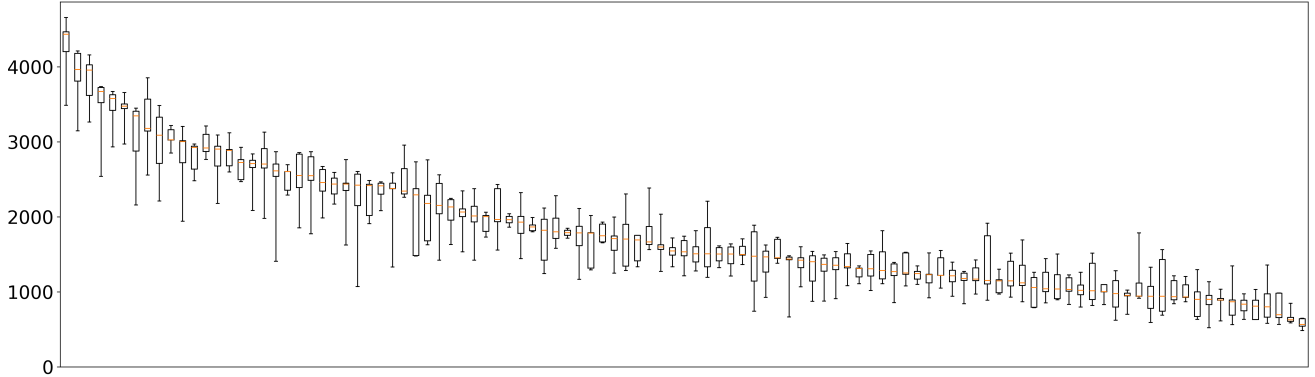

Figure 3. Box plots showing the number of images per data collection period and VCT-107 class. Class labels are provided in the appendix.

| Metaclass (topic)  | #classes | Class names                                                                                                                                                                                                                                                               |
|--------------------|----------|---------------------------------------------------------------------------------------------------------------------------------------------------------------------------------------------------------------------------------------------------------------------------|
| Household Objects  | 7        | dining table, mug, chair, sofa, pillow, stove, spoon                                                                                                                                                                                                                      |
| Animals            | 31       | dog, cat, horse, snake, fish, parakeet, frog, giraffe, turtle, elephant, rabbit, wallaby, hippopotamus, prairie dog, lemur, meerkat, salamander, iguana, zebra, african penguin, crocodile, donkey, chimpanzee, lion, gorilla, leopard, gibbon, toucan, polar bear, sloth |
| Sporting Equipment | 7        | bicycle, basketball, kite, surfboard, skateboard, snowboard, soccer ball                                                                                                                                                                                                  |
| Plants             | 25       | mushroom, rose, hydrangea, poppy, dahlia, orchid, peony, crocus, sunflower, hibiscus, columbine, tulip, amaryllis, lavender, tomato, cosmos, pansy, lilac, iris, foxglove, hyacinth, daffodil, strawberry, broccoli, artichoke                                            |
| Apparel            | 8        | suit, sneakers, dress, scarf, raincoat, t-shirt, tie, hoodie                                                                                                                                                                                                              |
| Food               | 8        | pasta, ramen, cupcakes, pancakes, croissant, sushi, ice cream, burger                                                                                                                                                                                                     |
| Vehicles           | 11       | car, airplane, sailboat, motorcycle, bus, tram, truck, canoe, helicopter, tuk-tuk, yacht                                                                                                                                                                                  |
| Electronic Devices | 2        | laptop, headphones                                                                                                                                                                                                                                                        |
| Buildings          | 8        | church, skyscraper, house, windmill, greenhouse, gas station, restaurant, observation tower                                                                                                                                                                               |

Table 1. List of the metaclasses (topics) and classes of the VCT-107 dataset. The classes of a given metaclass are ordered by decreasing median number of images per period. See Tables 3 to 5 for the detailed number of samples per class.

| 2007-08 | 2010-11 | 2013-14 | 2016-17 | 2019-20 |
|---------|---------|---------|---------|---------|
| 86.6%   | 87.4%   | 86.7%   | 85.3%   | 84.0%   |

Table 2. Zero-shot accuracy of ViT-B/16 CLIP model on each period

are listed in Table 1. The results, presented in Table 2, indicate that the final period (2019-2020) is slightly more challenging than the others.

## E. Data augmentation

In Section 4, we apply standard data augmentation techniques. Below, we present the results of preliminary tests that guided our choice of these specific augmentations.

To do so, we used ResNet18, as it is the easiest model

to train from scratch with a “small” dataset such as VCT-107. We selected three sets of data augmentations. (i) The first does not include any data augmentation. (ii) The second uses the most common data augmentation operation, which consists of randomly cropping the images and then flipping them horizontally with a probability of 0.5. (iii) Finally, the third set of data augmentations includes additional transformations, such as random adjustments to luminosity, saturation, contrast, and hue, randomly rotating the images, random cropping, and finally randomly flipping the images horizontally. The factors for luminosity, saturation, and contrast are picked from the range [0.6, 1.4], the hue factor is chosen from the range [-0.4, 0.4], and the rotation is uniformly selected from the range [-20°, +20°].

In Figure 5, we can see that the model is affected by the change in the data collection period, regardless of the data

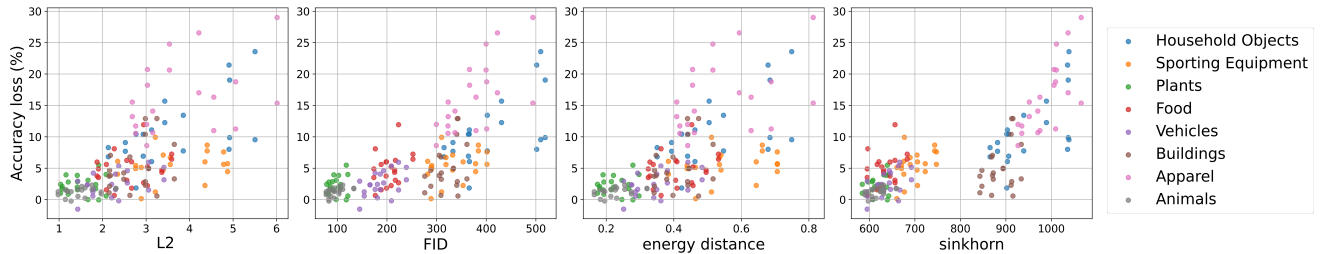

Figure 4. Relative accuracy loss over time for the classes of the general VCT-107 topics as a function of distribution shift measured with four metrics. In this figure, all the samples belonging to the *metaclass* are considered as samples from a single distribution. This differs from the results given in the Section 5.2 for which a distribution only contains one class

augmentations chosen. However, we note that not performing any data augmentation generally reduces the model’s accuracy.

In Figure 6, we observe that in the case of linear probing with a pre-trained model, applying either more data augmentation (option (iii)) or no data augmentation at all (option (i)) leads to worse performance. This can be explained by the fact that the feature extractor was pre-trained using only the data augmentations corresponding to the intermediate data augmentation set (option (ii)).

In conclusion of these experiments, we decided to only use the standard data augmentations that correspond to those used in the pre-training of the backbones. We also maintain these values for tests with non-pre-trained networks because the results from Figure 1 show that we do not gain any improvement by using additional data augmentations.

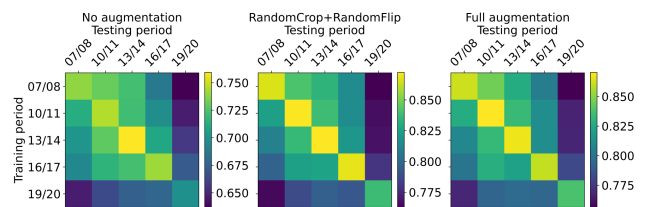

Figure 6. Accuracy when training a linear probes on a ResNet18 on one period and testing on the others. The pretraining was done with ILSVRC. The experiment was done with three sets of data augmentation.

In Figure 4, we can see that in this case, FID fails to assign smaller values to *Sporting Equipment* than *Household Objects*. This would have been the expected result as the meta-class *Sporting equipment* suffers from less loss in accuracy when generalizing to other periods.

Meanwhile, the results for Sinkhorn stay very similar to those observed in Section 5.

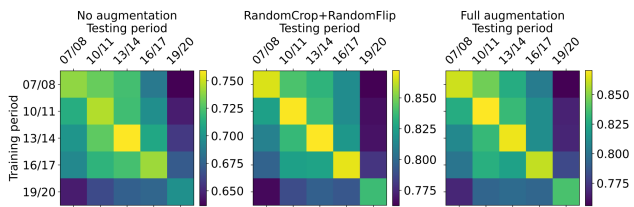

Figure 5. Accuracy when training a ResNet18 from scratch on one period and testing on the others. The experiment was done with three sets of data augmentation.

### F. Shift measured on the entire topic

In Section 5, for each class, we measured the distance between the distribution of each period. Here, we use the same distances but consider the distributions at the topic level instead of the class level. Intuitively, the distribution will have a greater chance of being multimodal. This can be important for FID as it supposes multivariate normality [1]. Therefore, this result is only for informational purposes.

### References

- [1] D.C. Dowson and B.V. Landau. The fréchet distance between multivariate normal distributions. *Journal of multivariate analysis*, 12(3):450–455, 1982. 4
- [2] Dipam Goswami, Yuyang Liu, Bartłomiej Twardowski, and Joost van de Weijer. Fecam: Exploiting the heterogeneity of class distributions in exemplar-free continual learning. *Advances in Neural Information Processing Systems*, 36, 2024. 1
- [3] Mark D McDonnell, Dong Gong, Amin Parvaneh, Ehsan Abbasnejad, and Anton van den Hengel. Ranpac: Random projections and pre-trained models for continual learning. *Advances in Neural Information Processing Systems*, 36, 2024. 2

| Class names $A \rightarrow H$ | 2007-2008 | 2010-2011 | 2013-2014 | 2016-2017 | 2019-2020 |
|-------------------------------|-----------|-----------|-----------|-----------|-----------|
| african penguin               | 1367      | 1491      | 1274      | 1449      | 877       |
| airplane                      | 3625      | 3578      | 3419      | 3669      | 2933      |
| amaryllis                     | 1788      | 1822      | 1846      | 1714      | 1753      |
| artichoke                     | 888       | 809       | 1032      | 631       | 629       |
| basketball                    | 1210      | 1503      | 1640      | 1597      | 1374      |
| bicycle                       | 3205      | 3001      | 3015      | 2722      | 1940      |
| broccoli                      | 1281      | 1148      | 976       | 798       | 621       |
| burger                        | 1001      | 1297      | 900       | 670       | 633       |
| bus                           | 2305      | 2516      | 2592      | 2435      | 2169      |
| canoe                         | 1930      | 2321      | 2005      | 1779      | 1441      |
| car                           | 3736      | 3722      | 3522      | 3669      | 2538      |
| cat                           | 4179      | 3965      | 4211      | 3807      | 3147      |
| chair                         | 2003      | 2345      | 2065      | 2106      | 1532      |
| chimpanzee                    | 1453      | 1221      | 1551      | 1220      | 1049      |
| church                        | 3619      | 3956      | 4158      | 4025      | 3263      |
| columbine                     | 1892      | 1990      | 1815      | 1864      | 1800      |
| cosmos                        | 2384      | 1870      | 1664      | 1631      | 1564      |
| crocodile                     | 1644      | 1318      | 1508      | 1336      | 1082      |
| crocus                        | 2132      | 2228      | 2247      | 1956      | 1631      |
| croissant                     | 942       | 1327      | 1072      | 591       | 779       |
| cupcakes                      | 1915      | 1748      | 1151      | 1105      | 889       |
| daffodil                      | 1253      | 1079      | 1518      | 1234      | 1528      |
| dahlia                        | 2869      | 3100      | 2916      | 3211      | 2765      |
| dining table                  | 2603      | 2421      | 2150      | 2568      | 1070      |
| dog                           | 4464      | 4655      | 4433      | 4200      | 3485      |
| donkey                        | 1814      | 1283      | 1534      | 1107      | 1173      |
| dress                         | 1965      | 2374      | 2431      | 1934      | 1558      |
| duck                          | 2081      | 2301      | 2447      | 2466      | 2412      |
| elephant                      | 2374      | 1931      | 2010      | 2141      | 1421      |
| fish                          | 2868      | 2704      | 2611      | 2540      | 1407      |
| foxglove                      | 1018      | 1544      | 1210      | 1499      | 1307      |
| frog                          | 2341      | 2456      | 2671      | 2631      | 1985      |
| gas station                   | 1244      | 1273      | 1345      | 1170      | 1098      |
| gibbon                        | 1504      | 1037      | 910       | 1228      | 894       |
| giraffe                       | 2586      | 2449      | 2377      | 2375      | 1330      |
| gorilla                       | 971       | 987       | 1162      | 1303      | 1147      |
| greenhouse                    | 1481      | 1463      | 1436      | 1429      | 665       |
| headphones                    | 1355      | 1454      | 1535      | 1296      | 910       |
| helicopter                    | 971       | 1150      | 1169      | 1425      | 1320      |
| hibiscus                      | 1960      | 2004      | 2040      | 1919      | 1863      |
| hippopotamus                  | 1997      | 1553      | 1708      | 1744      | 1248      |
| hoodie                        | 848       | 587       | 628       | 607       | 660       |
| horse                         | 3569      | 3144      | 3177      | 3852      | 2555      |
| house                         | 2550      | 2854      | 2834      | 2390      | 1852      |
| hyacinth                      | 1392      | 1216      | 1372      | 1268      | 856       |
| hydrangea                     | 2851      | 3217      | 3023      | 3025      | 3161      |

Table 3. Number of samples per period for class names from A to H.

| Class names $I \rightarrow S$ | 2007-2008 | 2010-2011 | 2013-2014 | 2016-2017 | 2019-2020 |
|-------------------------------|-----------|-----------|-----------|-----------|-----------|
| ice cream                     | 1206      | 932       | 1094      | 926       | 868       |
| iguana                        | 1601      | 1323      | 1423      | 1455      | 1067      |
| iris                          | 1347      | 1311      | 1107      | 1315      | 1200      |
| kite                          | 1801      | 1888      | 1474      | 1144      | 743       |
| laptop                        | 1820      | 2117      | 1966      | 1421      | 1243      |
| lavender                      | 1664      | 1902      | 1928      | 1746      | 1653      |
| lemur                         | 1742      | 1481      | 1533      | 1683      | 1215      |
| leopard                       | 1078      | 1146      | 1516      | 1406      | 930       |
| lilac                         | 1611      | 1588      | 1503      | 1321      | 1414      |
| lion                          | 1152      | 1272      | 1248      | 1179      | 840       |
| meerkat                       | 1398      | 1602      | 1278      | 1508      | 1814      |
| motorcycle                    | 2657      | 2708      | 2839      | 2753      | 2084      |
| mug                           | 2177      | 2758      | 2287      | 1680      | 1627      |
| mushroom                      | 3474      | 3655      | 3443      | 3502      | 2971      |
| observation tower             | 913       | 1034      | 892       | 888       | 612       |
| orchid                        | 2679      | 2597      | 2884      | 2896      | 3120      |
| pancakes                      | 1381      | 1515      | 1015      | 896       | 817       |
| pansy                         | 2035      | 1599      | 1273      | 1626      | 1566      |
| parakeet                      | 2603      | 2603      | 2353      | 2290      | 2694      |
| pasta                         | 2374      | 2294      | 2733      | 1483      | 1479      |
| peony                         | 2468      | 2723      | 2926      | 2762      | 2496      |
| pillow                        | 1086      | 1691      | 1120      | 1355      | 867       |
| polar bear                    | 1096      | 1095      | 1003      | 1000      | 831       |
| poppy                         | 2924      | 2970      | 2940      | 2635      | 2481      |
| prairie dog                   | 2305      | 1704      | 1901      | 1283      | 1344      |
| rabbit                        | 1615      | 2110      | 1873      | 1784      | 1167      |
| raincoat                      | 562       | 869       | 891       | 1346      | 688       |
| ramen                         | 1544      | 1718      | 1589      | 1333      | 1489      |
| restaurant                    | 947       | 981       | 1023      | 701       | 954       |
| rose                          | 2875      | 3406      | 3344      | 3447      | 2158      |
| sailboat                      | 2903      | 3091      | 2678      | 2939      | 2177      |
| salamander                    | 1445      | 1382      | 1455      | 1700      | 1726      |
| scarf                         | 2207      | 1856      | 1508      | 1335      | 1194      |
| skateboard                    | 1395      | 1134      | 1287      | 1215      | 941       |
| skyscraper                    | 2704      | 3129      | 2909      | 2651      | 1978      |
| sloth                         | 1134      | 829       | 953       | 900       | 521       |
| snake                         | 3483      | 3327      | 2712      | 3087      | 2211      |
| sneakers                      | 2350      | 2435      | 2763      | 2447      | 1624      |
| snowboard                     | 1058      | 1262      | 1190      | 789       | 794       |
| soccer ball                   | 940       | 915       | 1118      | 1785      | 944       |
| sofa                          | 1467      | 1264      | 1543      | 1624      | 926       |
| spoon                         | 835       | 972       | 749       | 634       | 887       |
| stove                         | 1431      | 1563      | 941       | 688       | 743       |
| strawberry                    | 1262      | 1443      | 1002      | 1040      | 852       |
| suit                          | 2549      | 2487      | 2799      | 2867      | 1775      |
| sunflower                     | 2016      | 2003      | 2062      | 1806      | 1730      |
| surfboard                     | 1519      | 1234      | 1121      | 1229      | 922       |
| sushi                         | 841       | 1149      | 1213      | 894       | 935       |

Table 4. Number of samples per period for class names from I to S.

| Class names $T \rightarrow Z$ | 2007-2008 | 2010-2011 | 2013-2014 | 2016-2017 | 2019-2020 |
|-------------------------------|-----------|-----------|-----------|-----------|-----------|
| t-shirt                       | 974       | 580       | 663       | 800       | 1357      |
| tie                           | 982       | 985       | 656       | 695       | 565       |
| tomato                        | 1691      | 1753      | 1753      | 1413      | 1333      |
| toucan                        | 963       | 1090      | 1021      | 1260      | 797       |
| tram                          | 2017      | 2415      | 2484      | 2433      | 1908      |
| truck                         | 2303      | 2956      | 2343      | 2641      | 2259      |
| tuk-tuk                       | 1187      | 1009      | 1033      | 1225      | 832       |
| tulip                         | 1800      | 1982      | 1580      | 2281      | 1713      |
| turtle                        | 2444      | 2559      | 2152      | 2041      | 1423      |
| wallaby                       | 1787      | 2017      | 1294      | 1782      | 1315      |
| windmill                      | 1362      | 1705      | 1608      | 1489      | 1498      |
| yacht                         | 649       | 483       | 565       | 642       | 542       |
| zebra                         | 1540      | 1481      | 1402      | 1142      | 873       |

Table 5. Number of samples per period for class names from T to Z.
